# Supplementary material for: The repressive effect of miR-520a on NF-κB/IL-6/STAT-3 signal involved in the glabridin-induced anti-angiogenesis in human breast cancer cells
Source: Royal Society of Chemistry journal article supplement (doi:10.1039/c4ra17062h), 2015-01-01
Supplement: c4ra17062h1.pdf [file c4ra17062h1.pdf]

## Supplementary data

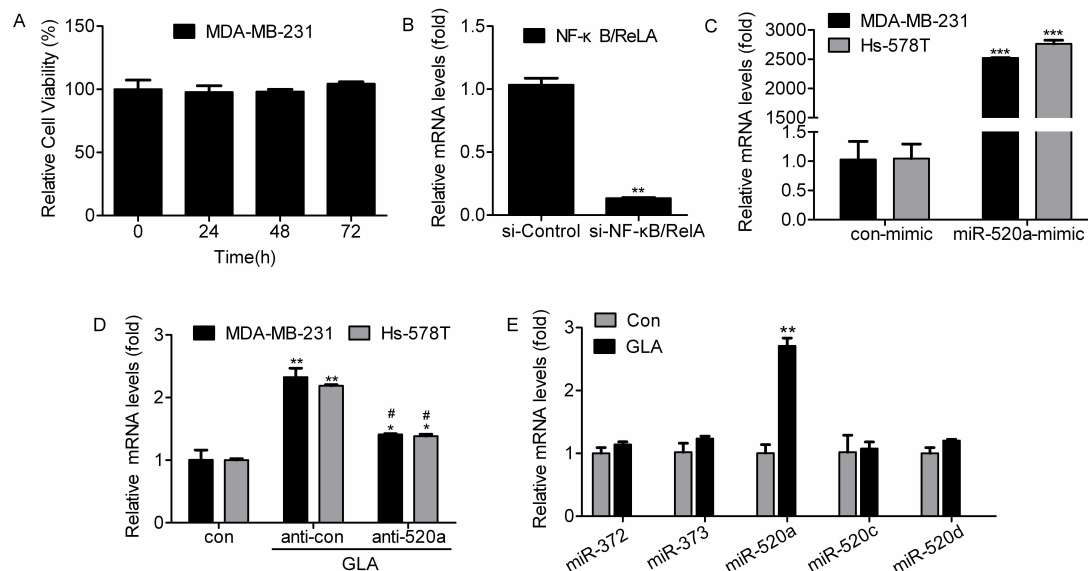

**Figure S1.** (A) MDA-MB-231 cells were exposed to 10  $\mu$ M GLA for 24, 48, or 72 h, the cell vitalities were analyzed by Cell Counting Kit-8 assay; (B) MDA-MB-231 cells were transfected by si-con or si-NF- $\kappa$ B/RelA for 12 h; qRT-PCR analysis of *NF- $\kappa$ B/RelA* mRNA (mean  $\pm$  SD, n = 3); (C-D) MDA-MB-231 or Hs-578T cells were transfected by con-mimic or miR-520a-mimic for 12 h; These cells were pre-transfected by anti-con or anti-miR-520a for 12 h, then they were treated by 10  $\mu$ M GLA for 72 h. qRT-PCR analysis of miR-520a(mean  $\pm$  SD, n = 3). (E) qRT-PCR analysis of miR-373/520 family at 72h (mean  $\pm$  SD, n = 3); \*\*P < 0.01 and \*\*\*P < 0.001 compared with control cells or cells transfected by mimic-con; \*\*P < 0.01 and #P < 0.05 compared with cells transfected by si-con or anti-con.

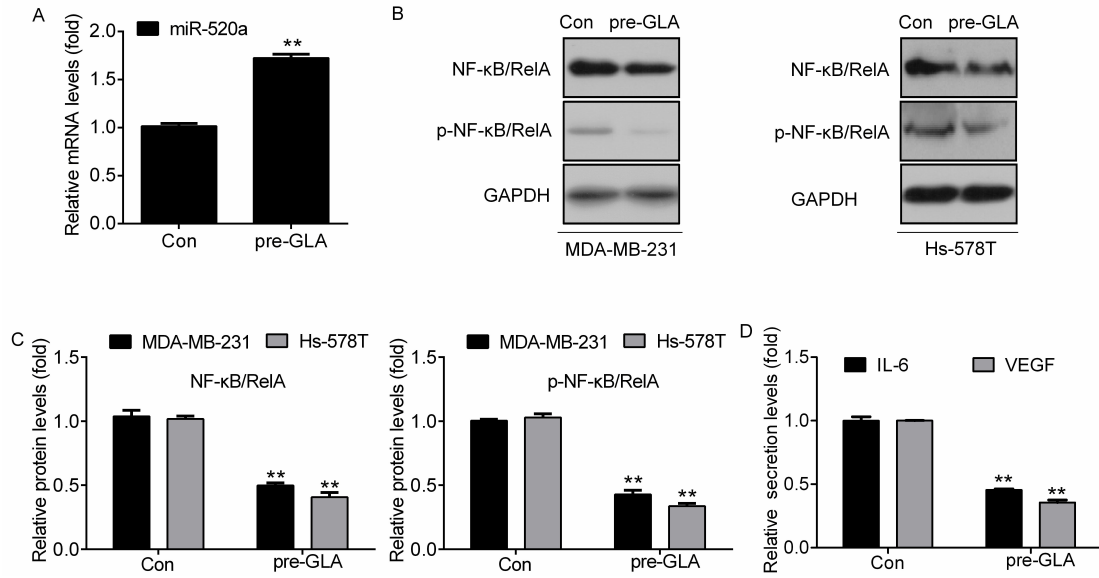

**Figure S2.** MDA-MB-231 cells were pre-treated by 0 or 10  $\mu$ M GLA for 72 h, respectively, then the previous mediums were removed, and cells were washed by 1xPBS to replace fresh mediums with 1% serum for 24h; the conditioned mediums were also collected; (A) qRT-PCR analysis of miR-520a(mean  $\pm$  SD, n = 3); (B) Western blot analysis and (C) relative protein levels of NF- $\kappa$ B/RelA, p-NF- $\kappa$ B/RelA(mean  $\pm$  SD, n = 3); (D) ELISA was used to detect the secretion of VEGF and IL-6 (mean  $\pm$  SD, n = 3);. \*\*P < 0.01 compared with medium control cells.
